# Supplementary material
Source: PubMed Central journal article supplement (PMC7456785)
Supplement: mmc1.pdf [file mmc1.pdf]

# THE LANCET

## Infectious Diseases

### **Supplementary appendix**

This appendix formed part of the original submission and has been peer reviewed. We post it as supplied by the authors.

Supplement to: de Lusignan S, Dorward J, Correa A, et al. Risk factors for SARS-CoV-2 among patients in the Oxford Royal College of General Practitioners Research and Surveillance Centre primary care network: a cross-sectional study. *Lancet Infect Dis* 2020; published online May 15. [http://dx.doi.org/10.1016/S1473-3099\(20\)30371-6](http://dx.doi.org/10.1016/S1473-3099(20)30371-6).

## Supplementary material

Figure S1: Ox-RCGP RSC practices by NHS Region in England

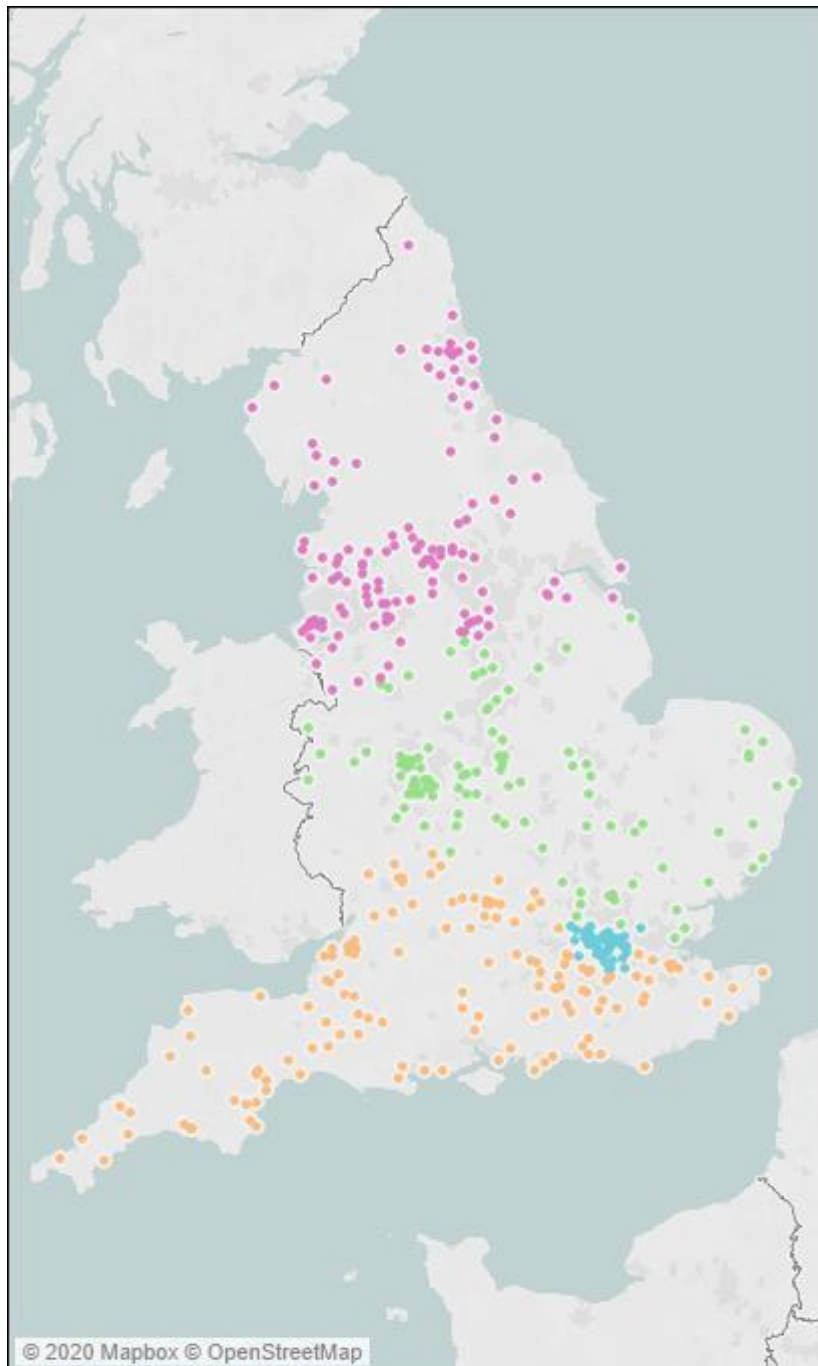

- NHS Regions**
- North
  - South
  - London
  - Midlands And East

Created using [www.openstreetmap.org](http://www.openstreetmap.org), licensed under CC BY-SA. Data is available under the Open Database Licence.

Table S1: Codes used to extract SARS-CoV-2 test results from electronic health records

| Concept Type | Code             | Term                                                                                                      |
|--------------|------------------|-----------------------------------------------------------------------------------------------------------|
| Positive     | 1240521000000100 | Otitis media caused by 2019 novel coronavirus (disorder)                                                  |
| Positive     | 1240531000000100 | Myocarditis caused by 2019 novel coronavirus (disorder)                                                   |
| Positive     | 1240541000000100 | Infection of upper respiratory tract caused by 2019 novel coronavirus (disorder)                          |
| Positive     | 1240551000000100 | Pneumonia caused by 2019 novel coronavirus (disorder)                                                     |
| Positive     | 1240561000000100 | Encephalopathy caused by 2019 novel coronavirus (disorder)                                                |
| Positive     | 1240571000000100 | Gastroenteritis caused by 2019 novel coronavirus (disorder)                                               |
| Positive     | 1240581000000100 | 2019 novel coronavirus detected (finding)                                                                 |
| Positive     | 1240751000000100 | Disease caused by 2019 novel coronavirus (disorder)                                                       |
| Positive     | 186747009        | Coronavirus infection (disorder)                                                                          |
| Negative     | 1240591000000100 | 2019 novel coronavirus not detected (finding)                                                             |
| Positive     | EMISNQCO303      | Confirmed 2019-nCoV (novel coronavirus) infection                                                         |
| Positive     | Y20d1            | Severe acute respiratory syndrome coronavirus 2 detected (finding)                                        |
| Positive     | Y210b            | Infection of upper respiratory tract caused by severe acute respiratory syndrome coronavirus 2 (disorder) |
| Negative     | EMISNQEX59       | Excluded 2019-nCoV (novel coronavirus) infection                                                          |
| Negative     | Y20d2            | Excluded 2019-nCoV (Wuhan) infection                                                                      |

Table S2: Sensitivity analysis of complete cases using multivariate logistic regression (N=2385)

| Variable                                                        | Level                 | OR (95% CI)       | P-value |
|-----------------------------------------------------------------|-----------------------|-------------------|---------|
| Age (years)                                                     | 0-17                  | 1                 |         |
|                                                                 | 18-39                 | 3.25 (0.73-14.41) | 0.1212  |
|                                                                 | 40-64                 | 5.56 (1.27-24.36) | 0.0229  |
|                                                                 | 65-74                 | 4.90 (1.09-22.10) | 0.0384  |
|                                                                 | 75+                   | 5.45 (1.21-24.63) | 0.0274  |
| Sex                                                             | Female                | 1                 |         |
|                                                                 | Male                  | 1.52 (1.20-1.93)  | 0.0005  |
| Ethnicity                                                       | White                 | 1                 |         |
|                                                                 | Asian                 | 1.31 (0.85-2.00)  | 0.2230  |
|                                                                 | Black                 | 5.52 (2.75-11.06) | <0.0001 |
|                                                                 | Mixed, Other          | 1.55 (0.84-2.86)  | 0.1592  |
| Socioeconomic deprivation level - Index of Multiple Deprivation | 5 (Least deprived)    | 1                 |         |
|                                                                 | 4                     | 1.47 (1.04-2.10)  | 0.0311  |
|                                                                 | 3                     | 2.65 (1.92-3.66)  | <0.0001 |
|                                                                 | 1 & 2 (Most Deprived) | 2.19 (1.56-3.07)  | <0.0001 |
| Settlement / Population Density                                 | Rural                 | 1                 |         |
|                                                                 | Urban                 | 4.75 (3.55-6.36)  | <0.0001 |
| Smoking Status                                                  | Non-smoker            | 1                 |         |
|                                                                 | Active Smoker         | 0.40 (0.26-0.63)  | 0.0001  |
|                                                                 | Ex-smoker             | 0.94 (0.73-1.22)  | 0.6666  |
| BMI*                                                            | Normal Weight         | 1                 |         |
|                                                                 | Over Weight           | 1.25 (0.95-1.66)  | 0.1119  |
|                                                                 | Obese                 | 1.61 (1.18-2.21)  | 0.0029  |
|                                                                 | Severely Obese        | 1.49 (0.85-2.59)  | 0.1633  |
| Hypertension                                                    | No                    | 1                 |         |
|                                                                 | Yes                   | 0.99 (0.75-1.31)  | 0.9302  |
| CKD                                                             | No                    | 1                 |         |
|                                                                 | Yes                   | 1.82 (1.22-2.71)  | 0.0033  |
| Diabetes                                                        | No                    | 1                 |         |
|                                                                 | Yes                   | 0.99 (0.73-1.34)  | 0.9279  |
| Chronic Heart Disease                                           | No                    | 1                 |         |
|                                                                 | Yes                   | 1.14 (0.83-1.56)  | 0.4245  |
| Chronic Respiratory Disease                                     | No                    | 1                 |         |
|                                                                 | Yes                   | 1.06 (0.71-1.60)  | 0.7731  |
| Malignancy and Immuno-compromised                               | No                    | 1                 |         |
|                                                                 | Yes                   | 0.92 (0.68-1.25)  | 0.5974  |

\*BMI categories based on World Health Organization classification<sup>i</sup> (normal weight 18.5-24.9 kg/m<sup>2</sup>, overweight 25.0-29.9 kg/m<sup>2</sup>, obese 30.0-39.9 kg/m<sup>2</sup>, severely obese ≥40 kg/m<sup>2</sup>)

Table S3: Sensitivity analysis with Ethnicity Group assigned at random in proportion to the local super output area ethnic group proportions (from census data).

| <b>Variable</b>                                                        | <b>Level</b>                     | <b>OR (95% CI)</b>      | <b>P-value</b>    |
|------------------------------------------------------------------------|----------------------------------|-------------------------|-------------------|
| <i>Age (years)</i>                                                     | <i>0-17</i>                      | <i>1</i>                |                   |
|                                                                        | <i>18-39</i>                     | <i>2.78 (1.65-4.67)</i> | <i>0.0001</i>     |
|                                                                        | <i>40-64</i>                     | <i>5.26 (3.20-8.64)</i> | <i>&lt;0.0001</i> |
|                                                                        | <i>65-74</i>                     | <i>4.24 (2.43-7.42)</i> | <i>&lt;0.0001</i> |
|                                                                        | <i>75+</i>                       | <i>4.99 (2.85-8.68)</i> | <i>&lt;0.0001</i> |
| <i>Sex</i>                                                             | <i>Female</i>                    | <i>1</i>                |                   |
|                                                                        | <i>Male</i>                      | <i>1.54 (1.26-1.88)</i> | <i>&lt;0.0001</i> |
| <i>Ethnicity</i>                                                       | <i>White</i>                     | <i>1</i>                |                   |
|                                                                        | <i>Asian</i>                     | <i>1.38 (0.95-2.03)</i> | <i>0.1000</i>     |
|                                                                        | <i>Black</i>                     | <i>4.99 (2.82-8.86)</i> | <i>&lt;0.0001</i> |
|                                                                        | <i>Mixed, Other</i>              | <i>1.63 (0.96-2.75)</i> | <i>0.0683</i>     |
| <i>Socioeconomic deprivation level - Index of Multiple Deprivation</i> | <i>5 (Least deprived)</i>        | <i>1</i>                |                   |
|                                                                        | <i>4</i>                         | <i>1.50 (1.12-2.01)</i> | <i>0.0067</i>     |
|                                                                        | <i>3</i>                         | <i>2.34 (1.77-3.10)</i> | <i>&lt;0.0001</i> |
|                                                                        | <i>1 &amp; 2 (Most Deprived)</i> | <i>2.10 (1.56-2.78)</i> | <i>&lt;0.0001</i> |
| <i>Settlement / Population Density</i>                                 | <i>Rural</i>                     | <i>1</i>                |                   |
|                                                                        | <i>Urban</i>                     | <i>4.62(3.60-5.92)</i>  | <i>&lt;0.0001</i> |
| <i>Smoking Status</i>                                                  | <i>Non-smoker</i>                | <i>1</i>                |                   |
|                                                                        | <i>Active Smoker</i>             | <i>0.47(0.32-0.68)</i>  | <i>0.0001</i>     |
|                                                                        | <i>Ex-smoker</i>                 | <i>0.86(0.69-1.10)</i>  | <i>0.2035</i>     |
| <i>BMI*</i>                                                            | <i>Normal Weight</i>             | <i>1</i>                |                   |
|                                                                        | <i>Over Weight</i>               | <i>1.25 (0.97-1.59)</i> | <i>0.0795</i>     |
|                                                                        | <i>Obese</i>                     | <i>1.39 (1.04-1.86)</i> | <i>0.0255</i>     |
|                                                                        | <i>Severely Obese</i>            | <i>1.25 (0.75-2.10)</i> | <i>0.3964</i>     |
| <i>Hypertension</i>                                                    | <i>No</i>                        | <i>1</i>                |                   |
|                                                                        | <i>Yes</i>                       | <i>0.90 (0.70-1.16)</i> | <i>0.4110</i>     |
| <i>CKD</i>                                                             | <i>No</i>                        | <i>1</i>                |                   |
|                                                                        | <i>Yes</i>                       | <i>1.91 (1.31-2.79)</i> | <i>0.0008</i>     |
| <i>Diabetes</i>                                                        | <i>No</i>                        | <i>1</i>                |                   |
|                                                                        | <i>Yes</i>                       | <i>1.0 (0.79-1.38)</i>  | <i>0.7692</i>     |
| <i>Chronic Heart Disease</i>                                           | <i>No</i>                        | <i>1</i>                |                   |
|                                                                        | <i>Yes</i>                       | <i>1.22 (0.92-1.61)</i> | <i>0.1649</i>     |
| <i>Chronic Respiratory Disease</i>                                     | <i>No</i>                        | <i>1</i>                |                   |
|                                                                        | <i>Yes</i>                       | <i>1.0 (0.72-1.49)</i>  | <i>0.8506</i>     |
| <i>Malignancy and Immuno-compromised</i>                               | <i>No</i>                        | <i>1</i>                |                   |
|                                                                        | <i>Yes</i>                       | <i>1.0 (0.78-1.31)</i>  | <i>0.9300</i>     |

\*BMI categories based on World Health Organization classification<sup>1</sup> (normal weight 18.5-24.9 kg/m<sup>2</sup>, overweight 25.0-29.9 kg/m<sup>2</sup>, obese 30.0-39.9 kg/m<sup>2</sup>, severely obese ≥40 kg/m<sup>2</sup>)

---

<sup>i</sup> World Health Organization. Physical status: the use and interpretation of anthropometry. Report of a WHO Expert Committee. World Health Organ Tech Rep Ser. 1995;854:1-452.  
[www.who.int/childgrowth/publications/physical\\_status/en/](http://www.who.int/childgrowth/publications/physical_status/en/) Accessed 28/04/2020
